Only two out of five articles by New Zealand researchers are free-to-access: a multiple API study of access, citations, cost of Article Processing Charges (APC), and the potential to increase the proportion of open access

Richard Kenneth Alistair White<sup>1</sup>, Anton Angelo<sup>2</sup>, Deborah Jane Fitchett<sup>3</sup>, Moira Fraser<sup>4</sup>, Luqman Hayes<sup>5</sup>, Jess Howie<sup>6</sup>, Emma Richardson<sup>7</sup>, Bruce Duncan White<sup>8</sup>

<sup>1</sup> Vice-Chancellor's Office, University of Otago, Dunedin, Otago, Aotearoa New Zealand

<sup>2</sup> Library, University of Canterbury, Christchurch, Canterbury, Aotearoa New Zealand

<sup>3</sup> Learning, Teaching & Library, Lincoln University, Lincoln, Canterbury, Aotearoa New Zealand

<sup>4</sup> Library, University of Canterbury, Christchurch, Canterbury, Aotearoa New Zealand

<sup>5</sup> Library, Auckland University of Technology, Auckland, Auckland, Aotearoa New Zealand

<sup>6</sup> Library, University of Waikato, Hamilton, Waikato, Aotearoa New Zealand

<sup>7</sup> Libraries & Learning Services, University of Auckland, Auckland, Auckland, Aotearoa New Zealand

<sup>8</sup> Office of the Provost, Massey University, Palmerston North, Manawatu, Aotearoa New Zealand

Corresponding Author:

Richard White<sup>1</sup>

362 Leith Street, Dunedin, Otago, 9010, New Zealand

Email address: [richard.white@otago.ac.nz](mailto:richard.white@otago.ac.nz)

## Abstract

We studied journal articles published by researchers at all eight of New Zealand universities in 2017 to determine how many were freely accessible on the web. We wrote software code to harvest data from multiple sources, code that we now share to enable others to reproduce our work on their own sample set. In May 2019, we ran our code to determine which of the 2017 articles were open at that time and by what method; where those articles would have incurred an Article Processing Charge (APC) we calculated the cost if those charges had been paid. Where articles were not freely available we determined whether the policies of publishers in each case would have allowed deposit in a non-commercial repository (Green open access). We also examined citation rates for different types of access. We found that, of our 2017 sample set, about two out of every five articles were freely accessible without payment or subscription (41%). Where research was explicitly said to be funded by New Zealand's major research funding agencies, the proportion was slightly higher at 45%. Where open articles would have incurred an APC we estimated an average cost per article of USD1,682 (for publications where all articles require an APC, that is, Gold open access) and USD2,558 (where APC payment is optional, Hybrid open access) at a total estimated cost of USD1.45m. Of the paid options, Gold is by far more common for New Zealand researchers (82% Gold, 18% Hybrid). In terms of citations, our

analysis aligned with previous studies that suggest a correlation between publications being freely accessible and, on balance, slightly higher rates of citation. This is not seen across all types of open access, however, with Diamond OA achieving the lowest rates. Where articles were not freely accessible we found that a very large majority of them (88% or 3089 publications) could have been legally deposited in an institutional repository. Similarly, only in a very small number of cases had a version deposited in the repository of a New Zealand university made the difference between the publication being freely accessible or not (125 publications). Given that most New Zealand researchers support research being open, there is clearly a large gap between belief and practice in New Zealand's research ecosystem.

## Introduction

Researchers seek to change the world and writers seek to be read, but for many years a dysfunctional scholarly publishing system has walled off most published research findings from the majority of its potential readership. Since the transition from print to electronic publishing began in the late 1990s, various initiatives explored the potential for this digital transformation to make research literature more accessible to the public. University libraries, concerned about continuing growth in journal subscription costs, hoped an open access system would provide a more affordable alternative. At the same time they sought to advance the mission of their host institutions to create social capital through the promulgation of quality peer-reviewed research.

Three major developments in the early 2000s set the scene for the current open access environment:

- The growth of "Gold open access" journals, funded by Article Processing Charges (APCs) rather than by subscriptions.
- The adoption of "Hybrid open access" options by subscription journals, making individual papers openly accessible through the payment of APCs.
- The growth of institutional and subject-specific repositories, providing an alternative route of "Green open access" to individual papers without publication charges.

Since then there has been considerable interest in the potential of open access to contribute to universities' own goals as a result of supporting broader society to access research outputs. This includes a growing understanding that, as a result of their enhanced availability, openly accessible papers are likely to be cited at a higher rate than those behind paywalls.

Unfortunately, open access has not produced the anticipated reduction in costs. Subscription costs of research journals continue to rise while APCs for Gold and Hybrid journals add another cost to university budgets (Guédon et al. 2019). Furthermore, whereas subscription costs were centralised within library budgets, APC charges are paid from a variety of sources, including

departmental budgets and external research funds, which makes them less visible and harder to manage (Monaghan et al. 2020). Moreover libraries have had limited success in encouraging researchers to deposit copies of their work in institutional repositories. In New Zealand, this is despite all universities having an institutional repository. The emergence of transformative agreements has also been a significant development. These agreements vary, but at their core they share the goal of shifting from subscription-based reading to contractually-based publishing. Although transformative agreements are becoming more common, they are still only a factor for a small number of institutions and their development is outside of the scope of this research.

New Zealand has no specific guidance from government or major research funding agencies on open access publishing or centralised support to pay APCs. While government has established an open access framework that applies to government agencies, this does not extend to the university sector (New Zealand Government 2014). A recent government consultation document on research strategy raised the possibility that a co-ordinated approach in the research sector could be of benefit.<sup>1</sup> To date, New Zealand's major funding agencies have not enforced requirements on research projects they fund to release research outputs or data with open licences. Some New Zealand universities have adopted open access policies and/or guidelines following the Green open access pathway (Wikipedia contributors 2020), as there is no government funding to enable Gold open access. Three universities operate small APC funds to support researchers to publish open access when this will achieve certain goals.

In 2019 the Council for New Zealand University Libraries (CONZUL) established a project team with representatives from seven of the eight New Zealand universities to research the current environment of open access in New Zealand. A major stream of this project sought to establish how much of our universities' research outputs were open access. While other tools provide a figure for the proportion of research that is open, we wanted to extend our understanding to determine:

- how much our researchers might be spending on Article Processing Charges (APCs) on top of what libraries pay in subscriptions;
- how much of our work could be freely accessible via self-archiving but is not; and
- the relationship between openness and citations or other measures of impact.

This paper reports on the findings of this project and makes our method and software code available to others to create their own sets of data and their own analyses.

This paper focuses on one element of the CONZUL Open Access Project. The wider project produced a full report (Fraser et al. 2019) examining the wider open access environment in New Zealand and an infographic designed to communicate its findings in a readily digestible format.

# Literature Review

As the prevalence of open access publication of research results has increased over the years (Abdiyarandi & Mayr 2019; Archambault et al. 2014; Archambault et al. 2013; Gargouri et al. 2010; Laakso et al. 2011; Maddi 2019; Martín-Martín et al. 2018; Piwowar et al. 2018; Wang et al. 2018), so too has the ability to gain insight into its nature and development. However, this has occurred alongside increasing complexity in the way open access levels are measured, and the resulting literature is methodologically diverse. A recent publication highlighted the need for critical reflection on the methods employed to measure open access development in order to address regional and political inequity (Huang et al. 2020). This literature review presents a brief overview of the main methodological approaches and relevant results.

Perhaps the most influential study in recent years was carried out by Piwowar et al. (2018). In their review of the literature, they note the paucity of studies between 2014 and the time of writing, however further large-scale studies quickly followed (Robinson-Garcia et al. 2020; Huang et al. (2020)). As more automated research on open access becomes possible through Application Programming Interfaces (APIs) and enhanced indexing, sample sizes have increased (Piwowar et al. 2018). How open access development is measured depends on a number of factors, including scope and source of data. Different methods are used according to the aims of the research. Some studies focus on a given country (Abdiyarandi & Mayr 2019; Bosman & Kramer 2019; Holmberg et al. 2019; Mikki et al. 2018; Piryani et al. 2019; Pölönen et al. 2019; Sivertsen et al. 2019) open access type (Wang et al. 2018) or funder (Kirkman 2018). Others aim for a global overview (Archambault et al. 2014; Laakso et al. 2011; Martín-Martín et al. 2018; Piwowar et al. 2018; Robinson-Garcia et al. 2020 Wang et al. 2018).

Because of this diversity, it is difficult to draw comparisons between results. Most recent studies point to an overall open access rate of between 45 and 55% (Bosman & Kramer 2019; Martín-Martín et al. 2018; Piwowar et al. 2018; Pölönen et al. 2019). This is significant because an open access rate of 50% is posited as a “tipping point” by some (Archambault et al. 2013). Where open access rate is calculated as total of the scholarly record or over an extended period, this figure drops dramatically – Piwowar et al. (2018) estimate the total percent of scholarly record at 28%, Maddi (2019) at 31%. Piwowar et al. (2019) hypothesize a rise to 44% by 2025. Where wider sources are included, such as Academic Social Networks (ASNs) or Google Scholar the open access rate rises (Martín-Martín et al. 2018; Nazim & Zia 2019). Unsurprisingly, older studies report lower rates (Bjork et al. 2010; Gargouri et al. 2010), reinforcing the findings of many scholars that open access is on the rise (Abdiyarandi & Mayr 2019; Archambault et al. 2014; Archambault et al. 2013; Gargouri et al. 2010; Laakso et al. 2011; Maddi 2019; Martín-Martín et al. 2018; Piwowar et al. 2018; Wang et al. 2018). The growth of Gold open access in particular has been noted (Archambault et al. 2014; Martín-Martín et al. 2018; Piryani et al. 2019; Pölönen et al. 2019). Despite this, the literature clearly shows that open access development varies by discipline (Bjork et al. 2010; Bosman & Kramer 2019; Maddi 2019; Martín-Martín et al. 2018;

Pirayani et al. 2019; Robinson-Garcia et al. 2020; Sivertsen et al. 2019) and country (Archambault et al. 2014; Maddi 2019; Martín-Martín et al. 2018; Robinson-Garcia et al. 2020 Sivertsen et al. 2019; Torres-Salinas et al. 2019; Wang et al. 2018).

It is important to note that all of these results can only be viewed as accurate at a given point of time. Both Archambault et al. (2014) and Robinson-Garcia et al. (2020) point out that freely accessible research does not always adhere to the tenets of “open access”. Open access is fluid in nature – closed articles can become open after embargoes, repositories can be backfilled and publications may be open access but only at the discretion of the publisher or on limited terms. This is manifest in the fact that Piwowar et al. (2018) introduced the Bronze category, defined as “made free-to-read on the publisher website, without an explicitly open license”. They noted that “It is also not clear if Bronze articles are temporarily or permanently available to read for free” (p.6). In fact, there is limited consensus on the definition of all open access types and even on the line between open access and non-open access. Similarly, the results of any study are also closely linked to its scope and source data – many studies use Web of Science or Scopus, which are known to under-represent certain areas of literature (Martín-Martín et al. 2018). As automation becomes more central to open access research, results become limited to those publications with a DOI, further excluding some important categories of research. Robinson-Garcia et al. (2019) argued that sources of open access status such as Unpaywall also need to be better understood in order to fairly represent open access rates.

The funding of open access through article processing charges (APCs) is another matter of high concern, although there is limited consensus in the literature around how these costs are to be estimated. A journal is classified as Gold if all articles are immediately open and APCs for these titles are recorded in the Directory of Open Access Journals (DOAJ), while for Hybrid journals the articles are paywalled unless an APC is charged. One method of estimating the cost of APCs to institutions is by examining financial records (Jahn & Tullney 2016; Pinfield et al. 2017; Solomon & Björk 2016) which aims to capture the actual amounts paid or by reviewing institutional agreements with publishers (Lovén 2019). The other main approach is capturing the advertised prices from DOAJ or publisher websites (Björk & Solomon 2015; Matthias 2018; Morrison et al. 2016; Solomon & Björk 2016).

Citation advantage is another topic that has been hotly debated in the literature. Research almost always finds a positive correlation between open access and citation rate (Archambault et al. 2014; Copiello 2019; McCabe & Snyder 2014; Mikki et al. 2018; Ottaviani 2016; Piwowar et al. 2018; Piwowar et al. 2019; Wang et al. 2015). However confounding factors cast considerable uncertainty over direct causation (Gaulé & Maystre 2011; Torres-Salinas et al. 2019). It is also clear that citation advantage is not distributed evenly across all disciplines (Holmberg et al. 2019) or types of open access (Mikki et al. 2018; Piwowar et al. 2018). In fact, several studies have found a citation *disadvantage* for Gold open access (Archambault et al. 2014; Archambault et al. 2013; Piwowar et al. 2018; Torres-Salinas et al. 2019). The way citation advantage (or lack



thereof) is measured can have a considerable influence on results, leading some scholars to use normalised figures such as Category Normalised Citation Impact (Torres-Salinas et al. 2019) or Average Relative Citation (Archambault et al. 2016) rather than total citations. Others argue that quality bias from self-selection (i.e., researchers select open access for higher quality work) inflate the apparent citation advantage (Torres-Salinas et al. 2019). However, some authors have found that a citation advantage exists despite confounding factors, albeit at a lower rate (Gargouri et al. 2010; McCabe & Snyder 2014; Ottaviani 2016). Attention, as measured by views, downloads and altmetrics, are similarly positively affected (Adie 2014; Holmberg et al. 2019; Wang et al. 2015) and Wang et al. (2015) found that downloads for open access publications were sustained for longer periods of time than non-open access. On balance, the literature largely confirms the open access citation advantage but the magnitude and reasons for this remain unclear.

## Materials & Methods

The CONZUL project team developed software that used Digital Object Identifiers (DOIs) to establish publications' open access status, APC price, and ability to be self-archived.

Our work depended on many open API services, the most integral being Unpaywall. As such our definition of 'open' in this study largely aligns with that of Unpaywall, including Bronze as initially proposed by Piwowar et al. (2018). Thus the openness of an article in our study is defined very broadly: "OA articles are free to read online, either on the publisher website or in an OA repository." Unpaywall does "not harvest from sources of dubious legality like ResearchGate or Sci-Hub" (Unpaywall). Table 1 shows the categories we used and an associated definition.

| Type of Open Access | Definition                                                                                                                            |
|---------------------|---------------------------------------------------------------------------------------------------------------------------------------|
| Gold OA             | Published version is immediate OA. APC charged.                                                                                       |
| Hybrid OA           | Publication is subscription-based. APC can be paid to make individual articles OA.                                                    |
| Bronze OA           | Currently free to read on publisher's site but licence not clear.                                                                     |
| Green OA            | Only accessible in a reputable repository (i.e. academic social networking sites are not included). Publisher's version is paywalled. |
| Closed              | Published version is paywalled.                                                                                                       |
| Diamond OA          | Published version is immediate OA. Derived from Unpaywall giving the status 'Gold' but where DOAJ shows no APC charged.               |

**Table 1 Open Access Type Definition**

Unpaywall uses a hierarchy to determine a single status for each paper. Priority is given to those statuses which imply immutability, specifically through publication in a Gold journal or through the payment of an APC in a Hybrid journal. For Gold journals no distinction is made between those that charge APCs and those that do not, following the definition of Gold as any form of open publication regardless of business model, as offered by Suber (2012). In our study, we were particularly interested in distinguishing between paid and unpaid forms of OA. Therefore, where the Directory of Open Access Journals (DOAJ) showed a Gold journal does not charge APCs, we re-categorised these as Diamond. This means we use the term ‘Gold’ in this paper exclusively to mean publication in an OA-only journal where an APC is charged. As already noted, Unpaywall introduced the Bronze status for papers openly available from the publishers but without an explicit license. Perhaps unfortunately, given questions around the persistence of Bronze open access, this status was given a higher priority than Green, which was reserved for papers openly accessible from repositories rather than from publishers. In this paper we use Green with the specific meaning that a publication has been made available in a reputable repository and that this is the only open version. Thus, while there may be overlap between categories, each publication is only given a single type of OA: for example, a paper may have been published in a Hybrid journal and deposited by a researcher in a repository; since the published version is ‘better’ according to the Unpaywall hierarchy, this is classified as Hybrid not Green. The status Closed is defined as papers that are not openly available in any form.

Piwowar et al (2018) found that under the version of the API running in 2018 found that 77% of all papers identified as open by a manual accuracy check were correctly identified as such and that 96% of the papers identified as open by the API were in fact open. The main variations are likely to occur from repository copies not being identified and Bronze papers reverting to Closed status over time. The Unpaywall API is widely used and provides robust comparability with other studies.

Overlaying the access dimension is the question of authorship. The number of authors of a published research article can range from one (sole authorship) to several thousand (project participation). Multiple authorship is a significant issue when we attempt to link published research to institutions and countries, particularly when there are no established norms for allocating divisions of responsibility. Where there are, say, 200 authors in a research group the fact that one of them is employed at University A tells us very little about the behaviour and performance of that institution, although a productive project may end up crediting it with numerous publications on the basis of participation by this single team member. This may be an insoluble problem for affiliation-based bibliometric research but in a project like the present one it is advisable not to ignore it. One means of creating a "strong link" between a paper and an institution is through the “corresponding author” who takes overall responsibility for the publication process. While this is often the first-named author, this is not universal.

For our purposes, we limited our sample set to journal articles with a Digital Object Identifier (DOI) published in 2017 that included at least one author affiliated with a New Zealand university. This provided a comprehensive dataset representing a large proportion of the research outputs of all eight universities in the country. Although we were carrying out the work in 2019 we chose to use 2017 as our sample set because, firstly, the research outputs were more likely to have passed the date for embargo set by publishers for self-archiving (one of our key interests) and, secondly, citation counts would be more mature than for more recent research.

DOIs for 2017 journal articles were gathered from each university, then amalgamated into a single file of more than 12,600 journal articles. If there was a local corresponding author at any university for a given article then it was designated as having a New Zealand corresponding author. During the course of the project we found that a small percentage of articles with large numbers of authors and large numbers of citations skewed the data so articles with more than 20 authors were excluded on the grounds that they had a tenuous connection to the New Zealand University that had submitted the DOI. This reduced the sample size to 12,016. These were fed into The Program.

## The Program

At the heart of our work was the ‘Program’, written in Python. One of our primary aims in publishing this paper is to share the code for the Program for others to use as well as detailing the results of our own work. The code is available here: <https://github.com/bruce-white-mass/conzul-oa-project>

A set of DOIs can be submitted to the Program, which uses a number of APIs to produce a set of results, whether for a single department, an institution, a discipline, a country (as in our case) or any other parameter. For our project, having compiled our list of DOIs as described above, we fed them into the Program using a Comma Separated Value file (.CSV). For each article the following information was obtained from a range of sources as shown in Table 2.

| <i>Information</i>                                 | <i>Source</i>                        |
|----------------------------------------------------|--------------------------------------|
| Metadata: author(s), title, journal, ISSN, etc.    | Unpaywall API                        |
| Open or closed                                     | Unpaywall API                        |
| Type of access (Gold, Hybrid, Green, Closed, etc.) | Unpaywall API                        |
| Reprint/corresponding author                       | Web of Science and Scopus (CSV file) |



|                                                             |                                                                                         |
|-------------------------------------------------------------|-----------------------------------------------------------------------------------------|
| Funders                                                     | Web of Science and Scopus (CSV file)                                                    |
| URLs of all repository versions                             | Unpaywall API                                                                           |
| Type of 'best open version': published, preprint, postprint | Unpaywall API                                                                           |
| APC/No APC                                                  | DOAJ (CSV file)<br>GitHub site of Lisa Matthias (Freie Universität Berlin) <sup>2</sup> |
| Journal and publisher archiving rules and embargo periods   | Sherpa/Romeo API                                                                        |
| Citations                                                   | Crossref API                                                                            |

**Table 2 Information gathered by the Program and corresponding data sources**

Errors are reported by the Program where information could not be found, for example if a DOI was not recognised.

DOIs were obtained from the individual universities. It was then possible to "chain" the data gathering. For example, Unpaywall provided ISSNs which were then submitted via API requests to Sherpa/Romeo to capture data on publisher allowances for the use of publications in institutional repositories. ISSNs were also used to capture data on APCs for individual journals.

However, not all the data used by the Program was accessible through APIs. Crossref was an excellent source of information for authors, even when these numbered in the thousands, but provides very limited data on author affiliations. On the other hand, Web of Science and Scopus provide detailed author-affiliation data, including identifying corresponding authors, but this needed to be output manually as CSV files for subsequent access by the program. A similar process was followed with APC data.

While this paper is focused on the national picture for New Zealand, for those who may be interested in utilising our code on their own DOIs we note that author affiliation data is included in the output. Therefore results can also be broken down to analyse subsets at the level of individual institutions.

The process described here is also presented in Figure 1.

<sup>2</sup> [github.com/lmatthia/publisher-oa-portfolios](https://github.com/lmatthia/publisher-oa-portfolios)

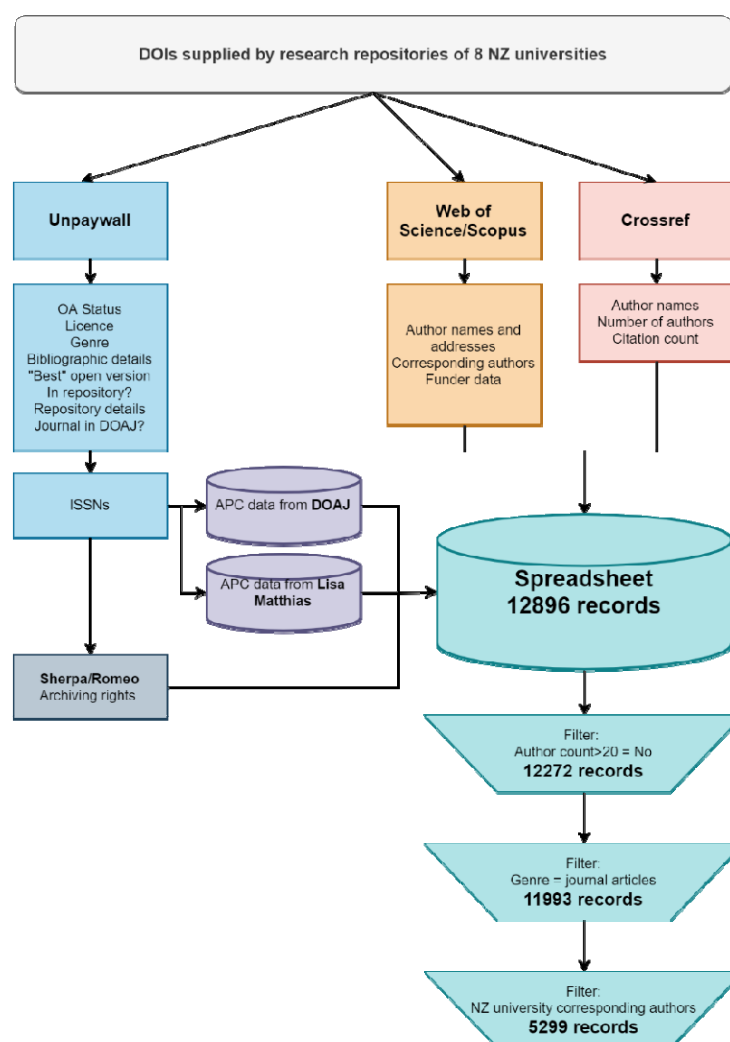

**Figure 1 Flowchart of data process**

## Results

The Program was run on 30 May 2019. The output was analysed and the following information extracted:

- the overall percentage of open and closed papers both for all authors and the subset of New Zealand corresponding authors;
- the total percentage of papers in each of the access categories: Closed, Gold, Hybrid, Bronze, Green, Diamond (note that the “best version” is reported so there was no overlap between categories.);
- the total percentage of papers available through repositories (note that because an article can be published and in a repository there is some overlap with the other categories);
- the total percentage of open and closed papers funded by major New Zealand agencies;

- the total cost for Gold and Hybrid papers if all APCs had been charged as advertised;
- the total cost of APCs as advertised if they had been paid on papers available in repositories;
- the total number of closed papers that could be made open as Author Accepted Manuscripts (AAM) as deduced from allowances recorded in Sherpa/Romeo;
- the total cost of APCs as advertised if these papers were made open in Hybrid mode.

## Overall proportion of open v closed articles

Overall 59% of all the articles in our sample set were only available behind a subscription paywall (see Table 3).

| Availability of article | Count        | %           |
|-------------------------|--------------|-------------|
| Closed                  | 7049         | 59%         |
| Open                    | 4944         | 41%         |
| <b>Total</b>            | <b>11993</b> | <b>100%</b> |

**Table 3 Proportion of articles with at least one New Zealand author which were open**

When we performed the same analysis of those articles where the corresponding author was affiliated with a New Zealand university (as opposed to *any* of the authors being from a New Zealand university) we found the proportion of open articles was significantly less (see Table 4). The proportion of open here reduced to 34%, meaning only 1 in 3 articles from 2017 where the corresponding author was affiliated with a New Zealand university was freely accessible.

| Availability of article | Count       | %           |
|-------------------------|-------------|-------------|
| Closed                  | 3501        | 66%         |
| Open                    | 1798        | 34%         |
| <b>Total</b>            | <b>5299</b> | <b>100%</b> |

**Table 4 Proportion of articles with New Zealand corresponding author which were open**

## Articles by type of access

As seen in Table 5, APC-incurring Gold open access comprises the largest proportion of open articles in our sample (35% of open articles and 14% of all articles). Green is next (26% of open articles or 10% of all articles), closely followed by Bronze. Hybrid is a significantly lower percentage with only 13% of open articles or 5% of all articles. Diamond clearly is not commonly used by New Zealand researchers.

| Type of access | Count        | %           |
|----------------|--------------|-------------|
| Bronze         | 1089         | 9%          |
| Closed         | 7049         | 59%         |
| Diamond        | 265          | 2%          |
| Gold           | 1706         | 14%         |
| Green          | 1256         | 10%         |
| Hybrid         | 628          | 5%          |
| <b>Total</b>   | <b>11993</b> | <b>100%</b> |

**Table 5 Articles by type of access**

It is worth noting the ‘overlap’ of publications available in a published OA form with repository versions. As detailed in our materials and methods section, we categorise types of OA using the Unpaywall method, which assigns a single type of OA to each publication and favours the published version over a Green one. While we report the proportion of Green-only OA in our sample as 10% or 1256 publications, we also investigated the number of publications that are available in Green and one of the other open forms: 3319 of 11993 (28%) total papers were available via a reputable repository. 2172 articles were available openly via the publisher and also via a repository, representing a considerable overlap. Of particular interest is the Bronze category, since these publications are of uncertain status and could revert to Closed. We found that 288 of 1089 Bronze papers in Table 5 were also available via a repository, meaning those would remain open even if the published version became Closed. If we add those 288 to our Green-only subset then the Green proportion would increase from 10% to 13% and Bronze would reduce from 9% to 7%.

We were also interested to determine how many publications were only available via a New Zealand university repository. Our dataset provides the URL for the repository version and by filtering for the string ‘.ac.nz’ (common to all eight New Zealand university repositories) we found that a total of 125 of the 1256 Green publications (10%) were only open because of that deposit. In other words the other 90% were available either as a published open version or in a non-New Zealand institutional or discipline-specific repository.

Again we analysed the subset of articles where a New Zealand university researcher was the corresponding author for the article (see Table 6).

| Type of access | Count | %   |
|----------------|-------|-----|
| Bronze         | 422   | 8%  |
| Closed         | 3501  | 66% |
| Diamond        | 95    | 2%  |
| Gold           | 697   | 13% |
| Green          | 432   | 8%  |

|              |             |             |
|--------------|-------------|-------------|
| Hybrid       | 152         | 3%          |
| <b>Total</b> | <b>5299</b> | <b>100%</b> |

**Table 6 Articles by type of access for New Zealand corresponding authors**

The pattern is broadly similar to the dataset for all authors (as seen in Table 5). Gold is most common (39% of the open subset and 13% of all articles); Green and Bronze are near-equal at 24% and 23% respectively of the open articles and 8% of all articles; Hybrid is somewhat lower here, with 8% of open and just 3% of the total. Diamond is constant at 2% of all articles.

**Citation rates**

We examined the publications in our dataset for the number of citations reported by Crossref and broke these down by the different types of access.

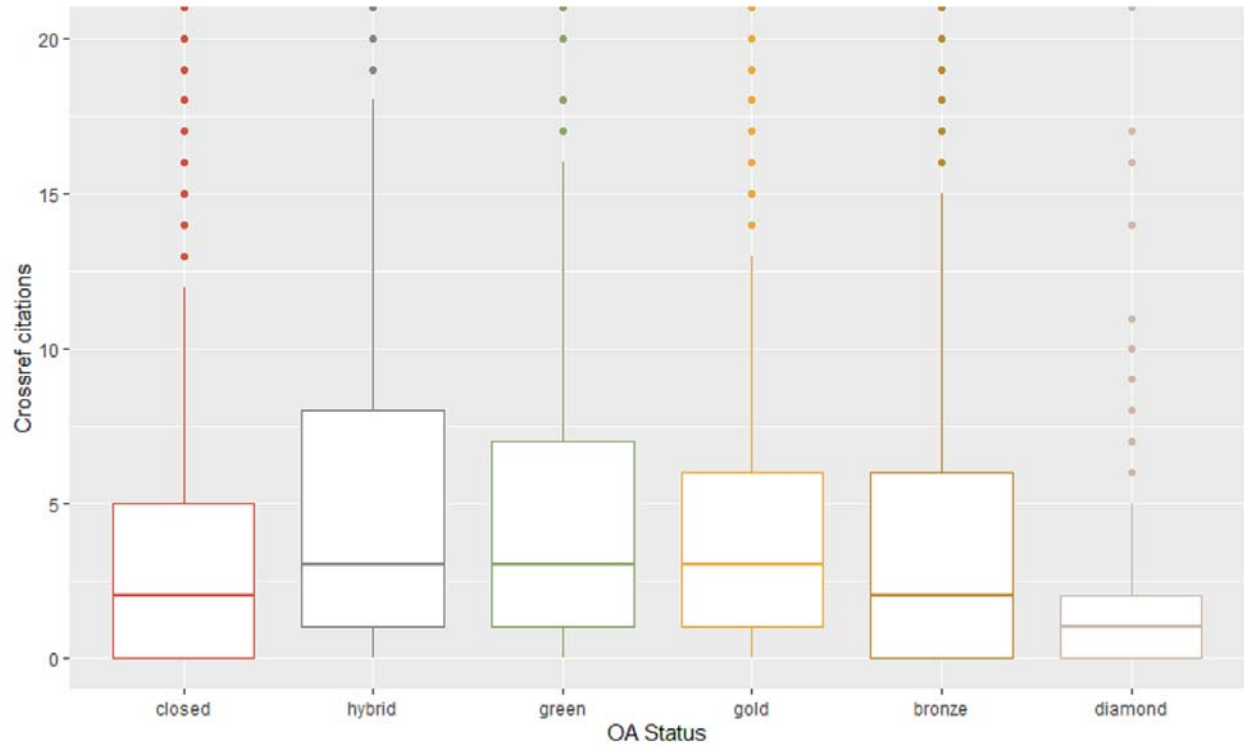

**Figure 2 Crossref citations for different types of access (cropped at 0-20 citations)**

|        | Count | Mean Citations | Median Citations | Standard Deviation | Standard Error | Confidence Interval (95%) |
|--------|-------|----------------|------------------|--------------------|----------------|---------------------------|
| Bronze | 1089  | 5.16           | 2                | 11.27              | 0.34           | 4.49, 5.83                |



|         |      |      |   |       |      |            |
|---------|------|------|---|-------|------|------------|
| Closed  | 7049 | 4.53 | 2 | 9.51  | 0.11 | 4.31, 4.75 |
| Diamond | 265  | 1.79 | 1 | 3.57  | 0.22 | 1.36, 2.22 |
| Gold    | 1706 | 5.14 | 3 | 7.75  | 0.19 | 4.77, 5.5  |
| Green   | 1256 | 7.54 | 3 | 26.23 | 0.74 | 6.09, 8.99 |
| Hybrid  | 628  | 7.50 | 3 | 15.53 | 0.62 | 6.29, 8.72 |

**Table 7 Standard error and confidence interval for citation rates by access type**

Each category of access contains a large number of outliers, that is, publications that were cited well above average for each access category. Also of note, publications with no citations at all were also very high for Diamond (47%), compared with Bronze (34%), Closed (25%) – each of these sitting on zero of the Y axis in our boxplot – and with the remaining categories closely grouped (Hybrid 20%, and Gold and Green together on 18%). In general, Figure 2 suggests a slightly higher rate of citation for open types of access compared to Closed, though one type – Diamond – performs the lowest in terms of citations. Table 7, which provides the standard error and the confidence interval of the mean for each category, reinforces Diamond as an outlier and higher rates of citation for the Green and Hybrid.

## Gold and Hybrid costs

We extrapolated the total number of articles that might have incurred an APC by adding together Hybrid and Gold figures. We see that 697 Gold articles and 152 Hybrid ones were published in 2017 in our local author subset (849 in total). The Program included a calculation of APCs for each article, where this was known via publicly-available data sources. This was calculated only for New Zealand university-affiliated authors on the basis that the corresponding author is the most likely to be responsible for paying an APC. While this is a far from certain means of determining how an APC was paid, as discussed by Gumpenberger et al (2018), it is the best one available from our sources and at scale gives the best approximation possible.

Thus Table 8 shows the average APC costs, US\$2558 for Hybrid and US\$1682 for Gold.

| Type of paid OA | Count      | %           | Known APCs | Known APC cost     | Known APC avg  |
|-----------------|------------|-------------|------------|--------------------|----------------|
| Gold            | 697        | 82%         | 697        | \$1,172,029        | \$1,682        |
| Hybrid          | 152        | 18%         | 110        | \$281,378          | \$2,558        |
| <b>Total</b>    | <b>849</b> | <b>100%</b> | <b>807</b> | <b>\$1,453,407</b> | <b>\$1,801</b> |

**Table 8 Gold and Hybrid articles**

We were also able to estimate the total APCs paid. Most publishers provide information on publishing charges and this data has been collected by Lisa Matthias of the Freie Universität Berlin (Matthias 2018). The ‘Known APC cost’ is a notional amount because:

- it is not possible to know where APCs may have been waived or whether they were paid from research funding, institutional funds, researchers' own money or another source; and
- this information is not available for all journals.

The APC costs in our tables are effectively a total of the 'list price' for each article based on APC information that is publicly-available. Accordingly, the total amount for both categories was US\$1.45 million at 2017 prices.

## Embargo periods and self-archiving

Sherpa/Romeo data let us examine which of the Closed articles could be self-archived according to publishers' policies. Table 9 shows, for all New Zealand-corresponding authors, when a Closed article may be deposited in an institutional repository after an embargo set by the publisher.

| Embargo period                      | Publisher policy allows accepted manuscript in repository | %           |
|-------------------------------------|-----------------------------------------------------------|-------------|
| Immediate self-archive              | 579                                                       | 17%         |
| 3 months                            | 3                                                         | 0%          |
| 4 months                            | 1                                                         | 0%          |
| 6 months                            | 73                                                        | 2%          |
| 12 months                           | 2115                                                      | 60%         |
| 18 months                           | 318                                                       | 9%          |
| <b>Total archivable by mid-2019</b> | <b>3089</b>                                               | <b>88%</b>  |
| 24 months or more                   | 213                                                       | 6%          |
| Not self-archivable                 | 199                                                       | 6%          |
| <b>Total closed articles</b>        | <b>3501</b>                                               | <b>100%</b> |

**Table 9 Articles that could be archived in a repository in line with publishers**

We ran the Program in mid-2019, meaning any embargo period of 18 months or less would have expired. 3089 articles could have been archived but were Closed, representing 88% of all the Closed articles (n=3501) in our sample set. If all of these were deposited then the overall open proportion would catapult from 41% to 67%. A further 212 articles have an embargo period of two years or more. It is worth noting that 12 months is by far the most common length of embargo period but also that for almost one-fifth there is no embargo. As we have noted above in the 'Articles by type of access' section, deposit in a New Zealand university repository only made the difference between open and Closed for 125 publications.

As a result we were also able to estimate a ‘theoretical’ cost of APCs under the Hybrid option for papers that could have been made open as accepted manuscripts. The total comes to just under US\$8 million.

Also of interest is that 114 of the 3089 articles that could have been deposited in a repository (3.7%) the publisher allowed the published version to be used, as opposed to the accepted manuscript.

The above calculations only consider publications where the corresponding author was from a New Zealand university, since the corresponding author is the most likely to have an accepted manuscript for deposit. However, if we extend our examination of Closed articles that could be deposited to all corresponding authors, again 88% have passed the embargo expiry date, which would mean 6204 of all the 7056 Closed papers could be placed in a repository. This would mean 93% of 2017 publications would be freely accessible without payment.

## Articles funded by New Zealand’s major funding agencies

Funder information from Web of Science and Scopus enabled us to estimate how much research funded by our major funding agencies is openly available, as shown in Tables 9 and 10. As indicated in our section on the context for the study, there has been no attempt by the government or major funding agencies to adopt a co-ordinated approach to open access in universities or to provide dedicated funds to support the payment of APCs. Similarly, none of these agencies release public information about outputs funded by them or the way in which they have been published.

More than half of articles in our 2017 sample that were funded by our largest research funders are behind a paywall (55%) – that is, this research is inaccessible to the government agencies that funded it as well as to the New Zealand public. Therefore, this subset of articles was more likely to be open than the total sample (45% open against 41% open). The Ministry for Business, Innovation and Employment has the lowest rate of open research at 35%, while the Health Research Council of New Zealand had the highest proportion with 55% of papers open. Papers with New Zealand corresponding authors and supported by these New Zealand funders were less likely to be open (44%) than those without New Zealand corresponding authors (49%). Detailed figures are presented in Table 10.

|                                                |               |               |               |             |               |               |              |
|------------------------------------------------|---------------|---------------|---------------|-------------|---------------|---------------|--------------|
| <b>All Authors</b>                             |               |               |               |             |               |               |              |
| <b>Funder</b>                                  | <b>Number</b> | <b>Closed</b> | <b>Bronze</b> | <b>Gold</b> | <b>Diam'd</b> | <b>Hybrid</b> | <b>Green</b> |
| Marsden Fund                                   | 505           | 54%           | 10%           | 13%         | 1%            | 5%            | 18%          |
| Rutherford Discovery Fellowship                | 90            | 44%           | 9%            | 21%         | 13%           | 12%           | 12%          |
| Royal Society of New Zealand                   | 714           | 54%           | 9%            | 14%         | 1%            | 6%            | 16%          |
| Health Research Council of New Zealand         | 468           | 45%           | 13%           | 29%         | 1%            | 3%            | 9%           |
| Ministry of Business Innovation and Employment | 443           | 65%           | 7%            | 16%         | 1%            | 5%            | 7%           |
| Total                                          | 1519          | 55%           | 9%            | 19%         | 1%            | 5%            | 11%          |
|                                                |               |               |               |             |               |               |              |
| <b>NZ Corresponding author</b>                 |               |               |               |             |               |               |              |
| <b>Funder</b>                                  | <b>Number</b> | <b>Closed</b> | <b>Bronze</b> | <b>Gold</b> | <b>Diam'd</b> | <b>Hybrid</b> | <b>Green</b> |
| Marsden Fund                                   | 362           | 57%           | 10%           | 13%         | 1%            | 4%            | 15%          |
| Rutherford Discovery Fellowship                | 68            | 51%           | 12%           | 13%         | 0%            | 12%           | 12%          |
| Royal Society of New Zealand                   | 515           | 57%           | 9%            | 14%         | 1%            | 5%            | 14%          |
| Health Research Council of New Zealand         | 356           | 46%           | 13%           | 29%         | 1%            | 3%            | 8%           |
| Ministry of Business Innovation and Employment | 303           | 65%           | 9%            | 17%         | 1%            | 3%            | 6%           |
| Total                                          | 1098          | 56%           | 10%           | 19%         | 1%            | 4%            | 10%          |
|                                                |               |               |               |             |               |               |              |
| <b>Non-NZ Corresponding author</b>             |               |               |               |             |               |               |              |
| <b>Funder</b>                                  | <b>Number</b> | <b>Closed</b> | <b>Bronze</b> | <b>Gold</b> | <b>Diam'd</b> | <b>Hybrid</b> | <b>Green</b> |
| Marsden Fund                                   | 143           | 45%           | 9%            | 12%         | 1%            | 7%            | 25%          |
| Rutherford Discovery Fellowship                | 22            | 23%           | 0%            | 45%         | 0%            | 18%           | 14%          |
| Royal Society of New Zealand                   | 199           | 47%           | 8%            | 15%         | 1%            | 9%            | 21%          |
| Health Research Council of New Zealand         | 112           | 43%           | 14%           | 27%         | 0%            | 4%            | 13%          |
| Ministry of Business Innovation and Employment | 140           | 64%           | 4%            | 14%         | 1%            | 9%            | 8%           |
| Total                                          | 421           | 51%           | 8%            | 18%         | 1%            | 8%            | 15%          |

**Table 10 Proportion of open articles funded by major New Zealand funders**

We can also see in Table 10 how the funded articles that are freely accessible have been made open. Gold was by far the most common means of making a work open (19% of all articles or 41% of all open publications); Hybrid accounted for just 5% of all articles or 11% of all open.

Green made up 11% of all works or 25% of open and Diamond just 2%. Bronze means, by definition, that the permanence of the remaining 9% of all articles or 21% of open works is uncertain. Combining the figures for Gold and Hybrid where the corresponding author was a New Zealand researcher, 22% of freely accessible research funded by these agencies theoretically incurred an APC. We calculated these 249 articles to cost US\$455,000 if the ‘list price’ was paid in each instance. This 22% compares to 14% of publications that would have incurred an APC where there was no funding from one of the major New Zealand government agencies. In other words, where work was specifically funded by one of these agencies an APC was more likely to have been paid.

Our sample set was large enough to allow comparisons with publications supported by public funding from Australia, the United States and the United Kingdom which showed substantially higher proportions of open publications for both New Zealand and non-New Zealand corresponding authors, as presented in Table 11.

| <b>All Authors</b>                  |            |               |               |             |               |               |              |
|-------------------------------------|------------|---------------|---------------|-------------|---------------|---------------|--------------|
| <b>Funder</b>                       | <b>No.</b> | <b>Closed</b> | <b>Bronze</b> | <b>Gold</b> | <b>Diam’d</b> | <b>Hybrid</b> | <b>Green</b> |
| NZ Govt                             | 1519       | 55%           | 9%            | 19%         | 1%            | 5%            | 11%          |
| US Govt                             | 271        | 24%           | 18%           | 20%         | 2%            | 14%           | 22%          |
| Aust Govt                           | 358        | 39%           | 11%           | 23%         | 1%            | 6%            | 20%          |
| UK Govt                             | 199        | 12%           | 17%           | 27%         | 1%            | 20%           | 24%          |
|                                     |            |               |               |             |               |               |              |
| <b>NZ Corresponding Authors</b>     |            |               |               |             |               |               |              |
| <b>Funder</b>                       | <b>No.</b> | <b>Closed</b> | <b>Bronze</b> | <b>Gold</b> | <b>Diam’d</b> | <b>Hybrid</b> | <b>Green</b> |
| NZ Govt                             | 1098       | 56%           | 10%           | 19%         | 1%            | 4%            | 10%          |
| US Govt                             | 52         | 33%           | 12%           | 17%         | 4%            | 13%           | 21%          |
| Aust Govt                           | 68         | 46%           | 10%           | 22%         | 0%            | 4%            | 18%          |
| UK Govt                             | 33         | 33%           | 15%           | 15%         | 3%            | 12%           | 21%          |
|                                     |            |               |               |             |               |               |              |
| <b>Non-NZ Corresponding Authors</b> |            |               |               |             |               |               |              |
| <b>Funder</b>                       | <b>No.</b> | <b>Closed</b> | <b>Bronze</b> | <b>Gold</b> | <b>Diam’d</b> | <b>Hybrid</b> | <b>Green</b> |
| NZ Govt                             | 421        | 51%           | 8%            | 18%         | 1%            | 8%            | 15%          |
| US Govt                             | 219        | 22%           | 20%           | 20%         | 2%            | 15%           | 22%          |
| Aust Govt                           | 290        | 37%           | 11%           | 23%         | 1%            | 7%            | 21%          |
| UK Govt                             | 166        | 8%            | 17%           | 29%         | 0%            | 22%           | 25%          |

**Table 11 Comparison of funded articles by country**



# Discussion

We found that three out of five articles with an author from a New Zealand university were only available by paying for access (59%). This figure increases to nearly two-thirds of all articles being closed when the corresponding author is a New Zealand university researcher (66%).

For validation of our results we looked at the Leiden ranking measure for openness. The Leiden Ranking (Centre for Science and Technology Studies 2018) uses a different method to ours, including using data from 2014-17 and including only 5 of the 8 New Zealand universities, but produces a similar result (see Table 12).

| Country     | # Papers  | # OA papers | Percentage OA |
|-------------|-----------|-------------|---------------|
| UK          | 454,802   | 322,827     | 71.0%         |
| Norway      | 42,608    | 23,109      | 54.2%         |
| US          | 1,876,219 | 1,013,502   | 54.0%         |
| Ireland     | 26,548    | 12,966      | 48.8%         |
| Germany     | 397,439   | 190,543     | 47.9%         |
| Canada      | 281,304   | 117,247     | 41.7%         |
| Australia   | 273,486   | 113,789     | 41.6%         |
| New Zealand | 29,091    | 11,266      | 38.7%         |

**Table 12 Leiden ranking proportion of open articles by country**

We also used the Leiden Ranking tool to measure New Zealand's proportion of open articles against a selection of other countries. We clearly see that New Zealand's proportion of research that is openly available is below that of all the others in this selection, nearly half the figure of the highest-ranked nation, the United Kingdom. This is reinforced by our analysis of publications funded by New Zealand's major funding agencies, where we can very clearly that research funded by agencies in other countries is far more likely to be openly accessible.

A huge proportion (88%) of the Closed articles could be self-archived in line with publishers' policies and thereby made open. Our findings suggest that New Zealand researchers do not self-archive as often as researchers elsewhere and/or that the systems for ensuring work is archived are not effective. This is despite the fact that 87% of New Zealand researchers believe that, at a policy level, publicly-funded research should be free to access (Ithaka S+R 2018). Our work identifies a clear gap between belief and practice.

When it comes to paid open access (Gold & Hybrid articles), New Zealand researchers are far more likely to use the Gold route (82% of paid open access articles were Gold). One reason for

this may be the higher average APC for Hybrid, which may be seen by researchers as a luxury and opted for when publishing work in a prestigious journal that will garner interest within the discipline and/or from the public. This would require further analysis that was beyond the scope of the present project. We estimated a total of US\$1.45 million at 2017 prices could have been spent by our researchers: US\$1.17 million of this would have been an entirely additional cost to subscriptions for Gold OA publications; US\$281 thousand would have been on Hybrid publications, a potential double-dipping cost on top of subscriptions to those same publications. As we mention in our introduction, discussion of transformative agreements with publishers is outside the scope of our paper but our data can certainly be used by libraries and institutions to estimate the costs that are potentially being paid by researchers on top of subscription costs.

For our methodology, using the Unpaywall categorisation of openness means Bronze articles pose something of a quandary. Bronze was introduced by Unpaywall to be able to include papers openly accessible at a given point in time, but lacking definitive licensing information. With our Program this meant, however, that later iterations using the same DOIs (not reported on in the present paper) revealed that many papers categorised as Bronze in May 2019 had reverted to Closed or had switched to Green. The Unpaywall hierarchy places Bronze above Green, since it is the published version, but there is no way of knowing which papers will become Closed if publisher paywall restrictions are reimposed and which will continue to remain accessible through repositories. Fortunately, because Unpaywall provides repository locations in addition to the primary status it is possible to identify these Bronze/Green articles, which, for our sample, constituted 26% of all Bronze Papers.

In terms of citations, the complicated nature of citation advantage (or disadvantage) is well documented in the literature (Gaulé & Maystre 2011; Mikki et al. 2018; Torres-Salinas et al. 2019). As noted in our review section, research largely suggests a correlation between openness and higher citation rates, though this is difficult to quantify, given contributing factors like disciplinary differences, the choice of publication venue by researchers, or the means by which citation rates are calculated. From our analysis, it is difficult to say definitively that open access confers a citation advantage, since different approaches to the question yield different answers. Given that two different types of open perform at opposite ends of the citation spectrum – Hybrid and Diamond – this seems to support the view that consideration needs to be given to factors such as journal choice by researchers or disciplinary norms for citation rates, which are outside the scope of the current study.

Nevertheless, our work does seem to support previous findings that there is a positive correlation between open access and higher citations (Archambault et al. 2014; Copiello 2019; McCabe & Snyder 2014; Mikki et al. 2018; Ottaviani 2016; Piwowar et al. 2018; Piwowar et al. 2019; Wang et al. 2015), though we note the number of outliers in each category that are highly-cited. One interesting subset for comparison is Closed and Green access, since Green publications are those that would be Closed but for an automated deposit process or a conscious decision by a

researcher or institution to make that work open. Our results suggest slightly higher rates of citation for Hybrid and Green; Closed does appear to perform slightly below other forms of access, with the exception of Diamond.

Also of note, articles that listed a major New Zealand funding agency achieved a higher overall rate of openness than the whole sample set (45% as opposed to 41%). However, this is still low considering such projects are funded specifically because they are deemed to be socially or economically valuable research to pursue and therefore worthy of targeted public funding. It should also be noted that there is a good deal of variance within the individual agencies (as low as 35% to as high as 55% open), which again evidences the lack of co-ordination amongst funders, including the government, in New Zealand. We can also see that Gold and Hybrid account for 22% of papers with a New Zealand corresponding author and that it is more likely that researchers with this kind of funding publish by paying an APC.

As we have seen, 3089 articles that were Closed could have been deposited in a repository. This number will have increased in the time that has elapsed since we conducted our analysis and the publication of this paper, since 24-month embargoes will have also expired. This represents an interesting consideration for universities. Clearly our institutional repositories are under-utilised if only 125 publications from 2017 are the only open version available. If those 3089 Closed articles were deposited then the overall proportion of open would catapult from 41% to 67% with the Green contribution increasing from 10% to 36%. A 2015 study found that the processing cost of depositing an article in an institutional repository, including the time of the author, was £33 (or about US\$43) (Johnson et al. 2016). Using this figure the 3,089 articles that are closed but could be open would cost US\$132,870. This compares to the US\$1.45 million identified in our project as potentially paid in Gold and Hybrid APCs and the amount reported by CONZUL as spent in 2017 by university libraries on subscription to electronic resources, NZ\$68.5 million (around US\$45 million) (Universities New Zealand 2019).

## Limitations of this research

We reiterate that the programmatic nature of our method means this does not represent all research, only articles with a DOI. Thus there will be disciplinary skews to the sample set, since journal articles and DOIs are more prevalent in certain disciplines. The research could easily be expanded to incorporate book chapters or other types of work that have a DOI. Nevertheless, not all research falls within the scope of our analysis.

As we have noted in our discussion above, Unpaywall, upon which much of our data gathering depends, updates its database constantly, including the repositories it sources information from. Thus any time the Program is run the results depend on the current state of the Unpaywall database. This can result in fluctuations in results even using the same set of DOIs when the Program is run at different times. Bronze access articles may, by their nature, change status over

time. This is not, in itself, problematic, but is noted here only because any set of data produced by the Program is a snapshot of a moment in time. We do intend to re-run the Program and do an analysis each year to track trends over time.

It is also possible that other open access discovery APIs could be utilised, such as the CORE API (<https://core.ac.uk/services/api/>). Use of different databases would naturally lead to different results, though we do not anticipate this would affect the overall findings significantly for New Zealand-based articles.

Another limitation is that our calculations of the amount spent on APCs is a maximum amount based on published prices, as noted in the section on our findings. Actual amounts paid will almost certainly be less because there will have been waivers or discounts applied.

We also note that deeper investigation of citation rates for different types of access would be of interest, building on our findings by calculating normalised citation rates and comparing differences between disciplines.

Finally, with respect to estimates of research funded by New Zealand's funding agencies, we noted above that those agencies do not provide publicly-available lists of research outputs they have funded and the means of publication. Thus there is no way for us to verify funder information reported by Web of Science and Scopus.

## Conclusions

In May 2019 we ran our specially-developed software to discover that about two out of every five articles authored by New Zealand researchers in 2017 were freely available on the web (41%). This is the first time we have an evidence-based picture of access to research by New Zealand universities with such detail since, as a result of our work, we have far more than a simple overall proportion: we can investigate the ways in which work has been made accessible, we can compare the citation rates for these different modes of access, we can quantify the volume of works that are closed access and could be made open and we can estimate how much paid forms of open access have cost.

Since our code is publicly available, anyone can run their own set of DOIs to perform their own analysis of these aspects.

Overall, we see that more New Zealand research from 2017 is behind a paywall than is freely accessible (41% freely accessible, 59% closed). However, when the corresponding author was a New Zealand researcher the open figure drops to around a third (34%). When our major funding

agencies have specifically funded the research the proportion of articles that is accessible is higher but still just under half is accessible without a subscription. .

Where work is freely accessible, Gold is the most likely means of achieving this at an average cost of USD1,682 per article; while Hybrid is used significantly less often it comes with a higher average price (USD2,558). In all the two paid methods of making research accessible comes with an estimated price tag – on top of library subscription costs, of course – of USD1.45m.

Green open access accounted for about one-quarter of our open articles. One further avenue we can investigate is where this work was archived, whether in our own university repositories or in public ones like PubMed. We found that this proportion could be greatly increased if our authors utilised the rights afforded to them by publishers to make versions of their work freely accessible in non-commercial repositories. Fully 3089 (88%) of Closed articles could be made available in this way but in our 2017 sample we identified a paltry 125 articles in New Zealand’s institutional repositories that made the difference between open and closed.

These findings beg several questions worthy of further research that are outside the scope of this paper. What are the barriers to self-archiving? The most likely reasons – of which we are aware from our own anecdotal experiences – are lack of time, lack of awareness of the possibility of self-archiving, confusion about copyright and embargo periods, negative perceptions of the status of author accepted manuscripts, and the lack of user-friendliness of software used to deposit works in a repository. Why do our researchers choose one mode of publication over another? Which publishers do our researchers favour when choosing open? What influences them to choose to pay a Hybrid APC? Does journal impact factor play a role in decisions or in citation rates? Are there disciplinary differences?

Our data can also be interrogated further than was possible within the scope of this paper. While our focus was on a national snapshot of open and closed publications, it is also possible for individual institutions to examine their own subsets of our data to determine costs and identify closed publications that could be deposited in their repositories. We have already mentioned that information garnered about APC payments can help institutions to estimate amounts paid by researchers for publishing when looking at the value of transformative publishing agreements with publishers.

What we do know is that New Zealand research is less likely to be open than research of other countries. Our overall proportion of open work lags behind other countries, our corresponding authors are less likely to make research open than corresponding authors from other countries and, clearly, we could be taking advantage of Green open access to a far greater extent than we are. This last point in particular suggests there are important policy and systemic issues that should be considered by New Zealand’s research community. Despite the fact we know most



authors support open access to research in principle, there is a very large gap between this belief and their practices in making New Zealand’s research outputs free to access.

## Acknowledgements

This research formed one part of a larger project under the auspices of the Council of New Zealand University Librarians. The authors acknowledge CONZUL’s guidance and support.

## References

- Abediyarandi N, and Mayr P. 2019. The state of open access in Germany: An analysis of the publication output of German universities. International Conference on Scientometrics & Informetrics. Rome, Italy.
- Adie E. 2014. Attention! A study of open access vs non-open access articles. Altmetric blog.
- Archambault É, Amyot D, Deschamps P, Nicol A, Provencher F, Rebout L, and Roberge G. 2014. Proportion of open access papers published in peer-reviewed journals at the European and world levels—1996–2013. Available at <https://digitalcommons.unl.edu/scholcom/8/2014>).
- Archambault E, Amyot D, Deschamps P, Nicol A, Rebout L, and Roberge G. 2013. Proportion of open access peer-reviewed papers at the European and world levels—2004–2011. Available at [https://www.science-metrix.com/pdf/SM\\_EC\\_OA\\_Availability\\_2004-2011.pdf](https://www.science-metrix.com/pdf/SM_EC_OA_Availability_2004-2011.pdf)2013).
- Archambault É, Côté G, Struck B, and Voorons M. 2016. Research impact of paywalled versus open access papers. Available at <https://digitalcommons.unl.edu/cgi/viewcontent.cgi?referer=https://www.google.com/&httpsredir=1&article=1028&context=scholcom2016>).
- Björk BC, and Solomon D. 2015. Article processing charges in OA journals: Relationship between price and quality. *Scientometrics* 103:373–385. DOI:10.1007/s11192-015-1556-z
- Bjork BC, Welling P, Laakso M, Majlender P, Hedlund T, and Gudnason G. 2010. Open access to the scientific journal literature: Situation 2009. *PLoS One* 5:e11273. DOI:10.1371/journal.pone.0011273
- Bosman J, and Kramer B. 2019. Publication cultures and Dutch research output: A quantitative assessment. Available at <https://zenodo.org/record/2643360#.Xid4X8gzaUk2019>).
- Centre for Science and Technology Studies. 2018. CWTS Leiden Ranking 2018. Available at <https://easy.dans.knaw.nl/ui/datasets/id/easy-dataset:970852018>).
- Copiello S. 2019. The open access citation premium may depend on the openness and inclusiveness of the indexing database, but the relationship is controversial because it is ambiguous where the open access boundary lies. *Scientometrics* 121:995–1018. DOI:10.1007/s11192-019-03221-w
- Fraser M, White R, Richardson E, Hayes L, Howie J, White B, Angelo A, Broughton S, and Fitchett D. 2019. Open Access in New Zealand universities: An environmental scan. Available at <https://www.universitiesnz.ac.nz/about-universities-new-zealand/unz-committees-and-working-groups/council-new-zealand-university2019>).
- Gargouri Y, Hajjem C, Lariviere V, Gingras Y, Carr L, Brody T, and Harnad S. 2010. Self-selected or mandated, open access increases citation impact for higher quality research. *PLoS One* 5:e13636. DOI:10.1371/journal.pone.0013636

Gaulé P, and Maystre N. 2011. Getting cited: Does open access help? *Research Policy* 40:1332-1338. DOI:10.1016/j.respol.2011.05.025

Guédon JC, Kramer B, and Laakso M. 2019. Future of scholarly publishing and scholarly communication: Report of the Expert Group to the European Commission. Available at <http://digitalcommons.unl.edu/scholcom/972019>).

Gumpenberger C, Hölbling L, Ignacio Gorraiz J. 2018. On the issues of a “corresponding author” field-based monitoring approach for gold open access publications and derivative cost calculations. *Frontiers in Research Metrics and Analytics* 3:1-3 DOI: 10.3389/frma.2018.00001

Huang CK, Neylon C, Hosking R, Montgomery L, Wilson K, Ozaygen A, Brookes-Kenworthy C. 2020. Evaluating institutional open access performance: Methodology, challenges and assessment. *BioRxiv*. DOI:1011.01/2020.03.19.998336

Holmberg K, Hedman J, Bowman TD, Didegah F, and Laakso M. 2019. Do articles in open access journals have more frequent altmetric activity than articles in subscription-based journals? An investigation of the research output of Finnish universities. *Scientometrics* 122:645-659. DOI:10.1007/s11192-019-03301-x

Ithaka S+R. 2018. CONZUL faculty survey: Aggregate report of findings.

Jahn N, and Tullney M. 2016. A study of institutional spending on open access publication fees in Germany. *PeerJ* 4:e2323. DOI:10.7717/peerj.2323

Johnson R, Pinfield S, and Fosci M. 2016. Business process costs of implementing “gold” and “green” open access in institutional and national contexts. *Journal of the Association for Information Science and Technology* 67:2283-2295. DOI:10.1002/asi.23545

Kirkman NS. 2018. A study of open access publishing by NHMRC grant recipients Master of Philosophy. Curtin University.

Laakso M, Welling P, Bukvova H, Nyman L, Bjork BC, and Hedlund T. 2011. The development of open access journal publishing from 1993 to 2009. *PLoS One* 6:e20961. DOI:10.1371/journal.pone.0020961

Lovén L. 2019. Monitoring open access publishing costs at Stockholm University. *Insights* 32. DOI:10.1629/uksg.451

Maddi A. 2019. Construction of a Normalized Open Access Indicator (NOAI). Available at <https://hal.archives-ouvertes.fr/hal-02328158/document2019>).

Martín-Martín A, Costas R, van Leeuwen T, and Delgado López-Cózar E. 2018. Evidence of open access of scientific publications in Google Scholar: A large-scale analysis. *Journal of Informetrics* 12:819-841. DOI:10.1016/j.joi.2018.06.012

Matthias L. 2018. publisher-oa-portfolios. Available at <https://github.com/lmatthia/publisher-oa-portfolios2018>).

McCabe MJ, and Snyder CM. 2014. Identifying the effect of open access on citations using a panel of science journals. *Economic Inquiry* 52:1284-1300. DOI:10.1111/ecin.12064

Mikki S, Gjesdal Ø, and Strømme T. 2018. Grades of openness: Open and closed articles in Norway. *Publications* 6:1-12. DOI:10.3390/publications6040046

Monaghan J, Lucraft M, Allin K, Graaf Mvd, and Clarke T. 2020. ‘APCs in the wild’: Exploring funding streams for an accelerated transition to Open Access. Available at [https://figshare.com/articles/\\_APCs\\_in\\_the\\_Wild\\_Could\\_Increased\\_Monitoring\\_and\\_Consolidation\\_of\\_Funding\\_Accelerate\\_the\\_Transition\\_to\\_Open\\_Access\\_/119881232020](https://figshare.com/articles/_APCs_in_the_Wild_Could_Increased_Monitoring_and_Consolidation_of_Funding_Accelerate_the_Transition_to_Open_Access_/119881232020)).

Morrison H, Mondésir G, Salhab J, Villamizar C, Calvé-Genest A, and Desautels L. 2016. Open Access Article Processing Charges (OA APC) longitudinal study 2015 preliminary dataset. 2016).

Nazim M, and Zia S. 2019. Acceptance and adoption of open access publishing by researchers in India. *Global Knowledge, Memory and Communication* 68:148-158. DOI:10.1108/gkmc-09-2018-0077

New Zealand Government. 2014. New Zealand Government Open Access and Licensing framework (NZGOAL). Available at <https://www.data.govt.nz/assets/Uploads/nzgoal-version-2-december-2014.pdf>(2014).

Ottaviani J. 2016. The post-embargo open access citation advantage: It exists (probably), its modest (usually), and the rich get richer (of course). *PLoS One* 11:e0159614. DOI:10.1371/journal.pone.0159614

Pinfield S, Salter J, and Bath PA. 2017. A “Gold-centric” implementation of open access: Hybrid journals, the “Total cost of publication,” and policy development in the UK and beyond. *Journal of the Association for Information Science and Technology* 68:2248-2263. DOI:10.1002/asi.23742

Piryani R, Dua J, and Singh VK. 2019. Open access levels and patterns in scholarly articles from India. *Current Science* 117:1435-1440.

Piwohar H, Priem J, Lariviere V, Alperin JP, Matthias L, Norlander B, Farley A, West J, and Haustein S. 2018. The state of OA: A large-scale analysis of the prevalence and impact of open access articles. *PeerJ* 6:e4375. DOI:10.7717/peerj.4375

Piwohar H, Priem J, and Orr R. 2019. The Future of OA: A large-scale analysis projecting open access publication and readership. DOI:10.1101/795310

Pölönen J, Guns R, Kulczycki E, Laakso M, and Sivertsen G. 2019. Open access challenge at the national level: Comprehensive analysis of publication channels used by Finnish researchers in 2016-2017. International Conference on Scientometrics & Informetrics. Rome, Italy.

Robinson-Garcia N, Costas R, and Leeuwen T. 2019. Indicators of open access for universities. International conference on scientometrics & informetrics. Rome, Italy.

Robinson-Garcia N, Costas R, and Leeuwen T. 2020. Open access uptake by universities. *PeerJ* 8:e9410. DOI:10.7717/peerj.9410

Sivertsen G, Guns R, Kulczycki E, and Pölönen J. 2019. The use of Gold open access in four European countries: An analysis at the level of articles. International Conference on Scientometrics & Informetrics. Rome, Italy. p 1600-1605.

Solomon D, and Björk B-C. 2016. Article processing charges for open access publication: The situation for research intensive universities in the USA and Canada. *PeerJ* 4:e2264. DOI:10.7717/peerj.2264

Suber P. 2012. *Open Access*. Cambridge: MIT Press.

Torres-Salinas D, Robinson-Garcia N, and Moed HF. 2019. Disentangling Gold open access. In: Glanzel W, Moed HF, Schmoch U, and Thelwall M, eds. *Springer handbook of science and technology indicators*, 129-145.

Universities New Zealand. 2019. Submission on review of the Copyright Act 1994: Issues Paper. Unpaywall. Frequently Asked Questions. Available at <https://unpaywall.org/faq>

Wang X, Cui Y, Xu S, and Hu Z. 2018. The state and evolution of Gold open access: A country and discipline level analysis. *Aslib Journal of Information Management* 70:573-584. DOI:10.1108/ajim-02-2018-0023

Wang X, Liu C, Mao W, and Fang Z. 2015. The open access advantage considering citation, article usage and social media attention. *Scientometrics* 103:555-564. DOI:10.1007/s11192-015-1547-0

Wikipedia contributors. 2020. Open access in New Zealand. Available at [https://en.wikipedia.org/w/index.php?title=Open\\_access\\_in\\_New\\_Zealand&oldid=953400278](https://en.wikipedia.org/w/index.php?title=Open_access_in_New_Zealand&oldid=953400278).
